# Supplementary material for: Physical Activity and Risk of Atrial Fibrillation: A Nationwide Cohort Study in General Population
Source: Springer Nature journal article supplement (doi:10.1038/s41598-019-49686-w), 2019-09-13

## Supplementary Information

### **Physical Activity and Risk of Atrial Fibrillation: A Nationwide Cohort Study in General Population**

Moo-Nyun Jin, MD<sup>1</sup>; Pil-Sung Yang, MD<sup>2</sup>; Changho Song, MD<sup>1</sup>; Hee Tae Yu, MD, PhD<sup>1</sup>;  
Tae-Hoon Kim, MD<sup>1</sup>; Jae-Sun Uhm, MD, PhD<sup>1</sup>; Jung-Hoon Sung, MD, PhD<sup>2</sup>; Hui-Nam Pak,  
MD, PhD<sup>1</sup>; Moon-Hyoung Lee, MD, PhD<sup>1</sup>; and Boyoung Joung, MD, PhD<sup>1</sup>

*<sup>1</sup>Division of Cardiology, Severance Cardiovascular Hospital, Yonsei University College of  
Medicine, Seoul, Republic of Korea*

*<sup>2</sup>Division of Cardiology, CHA Bundang Medical Center, CHA University, Seongnam,  
Republic of Korea*

**Supplementary Figure 1.** Cumulative incidence of atrial fibrillation by a Kaplan-Meier curves. (A) Comparison in different physical activity levels in overall study population; (B) Comparison between men and women; (C) Comparison in different physical activity levels in men; (D) Comparison in different physical activity levels in women

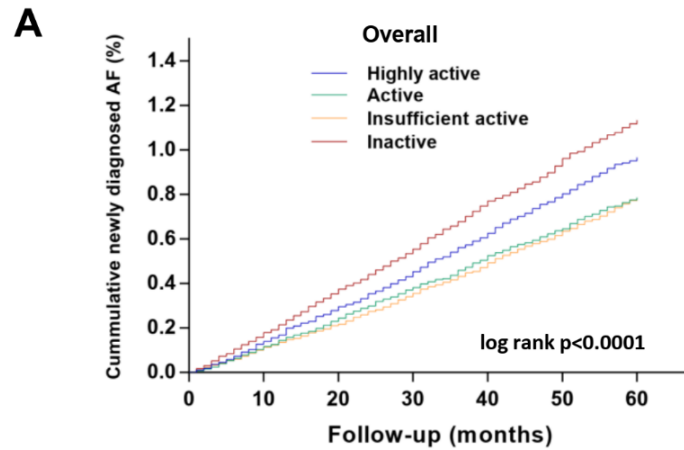

No. at risk

|                     |        |        |        |        |        |       |       |
|---------------------|--------|--------|--------|--------|--------|-------|-------|
| Inactive            | 125259 | 124977 | 115841 | 102652 | 85103  | 50217 | 49830 |
| Insufficient active | 157515 | 157323 | 145763 | 129729 | 108477 | 65751 | 65460 |
| Active              | 132823 | 132657 | 122667 | 109072 | 90749  | 54279 | 54056 |
| Highly active       | 86093  | 85987  | 79714  | 71364  | 60062  | 35874 | 35698 |

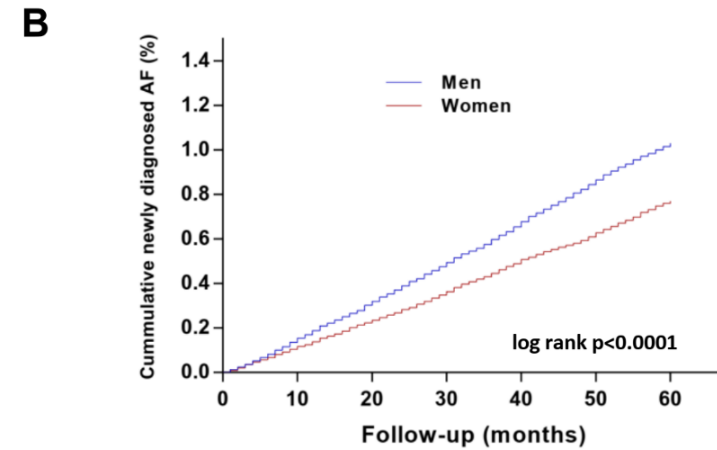

No. at risk

|       |        |        |        |        |        |        |        |
|-------|--------|--------|--------|--------|--------|--------|--------|
| Men   | 251026 | 250601 | 232817 | 208530 | 175993 | 112212 | 111526 |
| Women | 250664 | 250343 | 231168 | 204287 | 168398 | 93909  | 93518  |

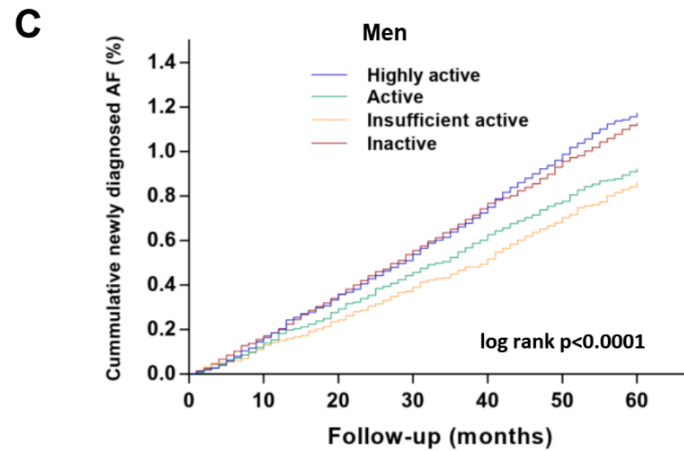

No. at risk

|                     |       |       |       |       |       |       |       |
|---------------------|-------|-------|-------|-------|-------|-------|-------|
| Inactive            | 85951 | 85752 | 79506 | 70683 | 59062 | 36993 | 36695 |
| Insufficient active | 45915 | 45859 | 42995 | 38952 | 33336 | 22155 | 22052 |
| Active              | 70396 | 70293 | 65154 | 58323 | 49089 | 31281 | 31128 |
| Highly active       | 48764 | 48697 | 45162 | 40572 | 34506 | 21783 | 21651 |

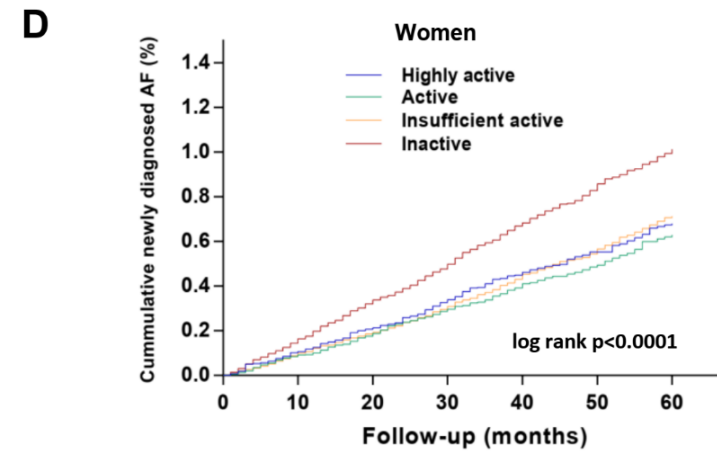

No. at risk

|                     |       |       |       |       |       |       |       |
|---------------------|-------|-------|-------|-------|-------|-------|-------|
| Inactive            | 69307 | 69174 | 64031 | 56637 | 46762 | 26243 | 26081 |
| Insufficient active | 81601 | 81515 | 75072 | 66109 | 54420 | 30577 | 30462 |
| Active              | 62427 | 62364 | 57513 | 50749 | 41660 | 22998 | 22928 |
| Highly active       | 37329 | 37290 | 34552 | 30792 | 25556 | 14091 | 14047 |

**Supplementary Figure 2.** Dose-response analyses of the association between total leisure time physical activity and risk of atrial fibrillation

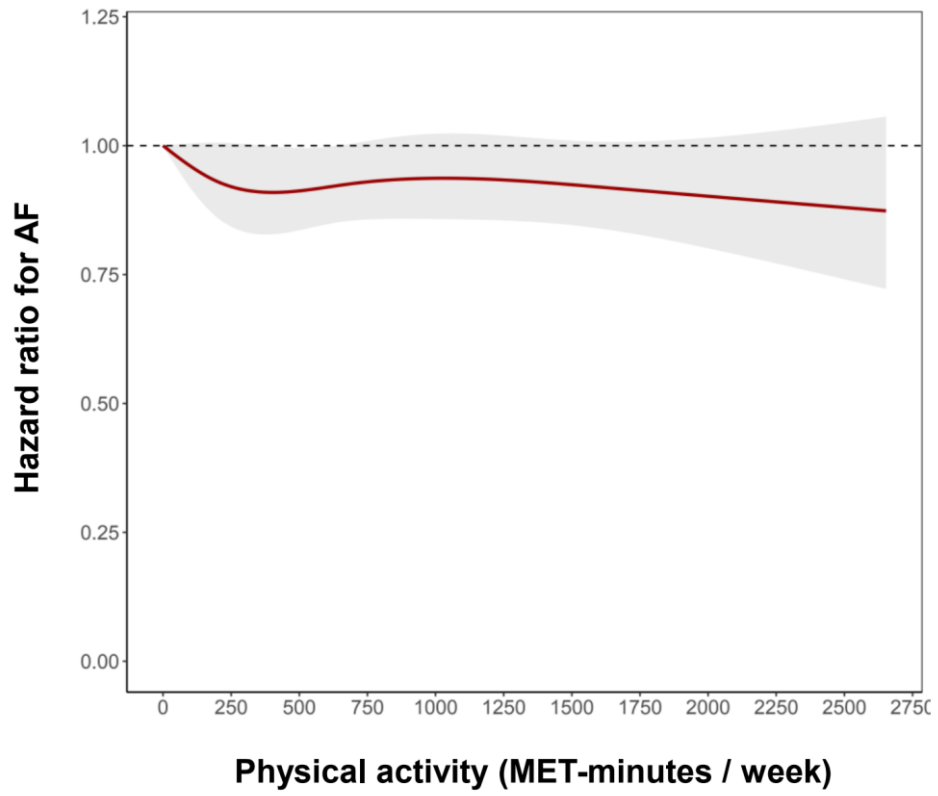

Supplement: 41598_2019_49686_MOESM1_ESM.pdf [file 41598_2019_49686_MOESM1_ESM.pdf]
